# Supplementary material
Source: publisher figshare collection journal article supplement (https://asha.figshare.com/articles/dataset/_/28098254)
Supplement: Supplementary file 1 [file 1]

**Supplemental Material S1.** Experiential learning written reflection prompts.

| At the beginning of the EL                                                                                                                                                                                                                                                                                                                                                        | At the conclusion of the EL                                                                                               |
|-----------------------------------------------------------------------------------------------------------------------------------------------------------------------------------------------------------------------------------------------------------------------------------------------------------------------------------------------------------------------------------|---------------------------------------------------------------------------------------------------------------------------|
| Create a goal that you have for yourself today. Describe what prompted you to create this goal.                                                                                                                                                                                                                                                                                   | Reflect on how the goal you created today was met or not met. Explain why you feel this way (A)                           |
| Describe what challenges you think that college students with TBI experience.                                                                                                                                                                                                                                                                                                     | Now that you have completed the simulation, describe key challenges you feel college students with TBI experience (A,E,W) |
| Describe how do think that today's experience will impact your professional roles.                                                                                                                                                                                                                                                                                                | Describe one station or activity that seemed most impactful for you and why (A,E)                                         |
|                                                                                                                                                                                                                                                                                                                                                                                   | List 1-3 single words to describe your EL experience.                                                                     |
| <b>Post EL Follow-Up Prompts, Embedded in Time 3</b>                                                                                                                                                                                                                                                                                                                              |                                                                                                                           |
| Reflect on how your awareness and understanding of TBI was impacted by the station activities. Please include at least 3 examples. (A)                                                                                                                                                                                                                                            |                                                                                                                           |
| Reflect on your experiences both wearing the goggles and as the caregiver partner. As the partner, did you discuss what kind of supports to provide or decide independently? When wearing the goggles, did your partner allow you to move freely or were they "overly helpful" by taking away some of your opportunities. Consider these roles within the context of ableism. (A) |                                                                                                                           |
| Reflect on how your feelings towards individuals with TBI-lived experience have changed or not changed after the EL. What do you feel prompted the changes? (E)                                                                                                                                                                                                                   |                                                                                                                           |
| Reflect on how you feel that the EL simulation will impact your TBI-specific clinical care for clients and families. If it will not be impactful, please write about that. (W)                                                                                                                                                                                                    |                                                                                                                           |
| Reflect on how/if you feel that the EL simulation will impact your overall SLP clinical care for clients and families. If it will not impact overall care, please write about that. (W)                                                                                                                                                                                           |                                                                                                                           |
| What did you like most about the MINDSOURCE TBI Experiential Learning?                                                                                                                                                                                                                                                                                                            |                                                                                                                           |

A = Awareness, E = Empathy, W = Workforce
