# Supplementary material
Source: publisher figshare collection journal article supplement (https://asha.figshare.com/articles/dataset/_/28098254)
Supplement: Supplementary file 3 [file 1]

**Supplemental Material S2.** Photos of hallway data reflecting the socially constructed simulation experience in real time.

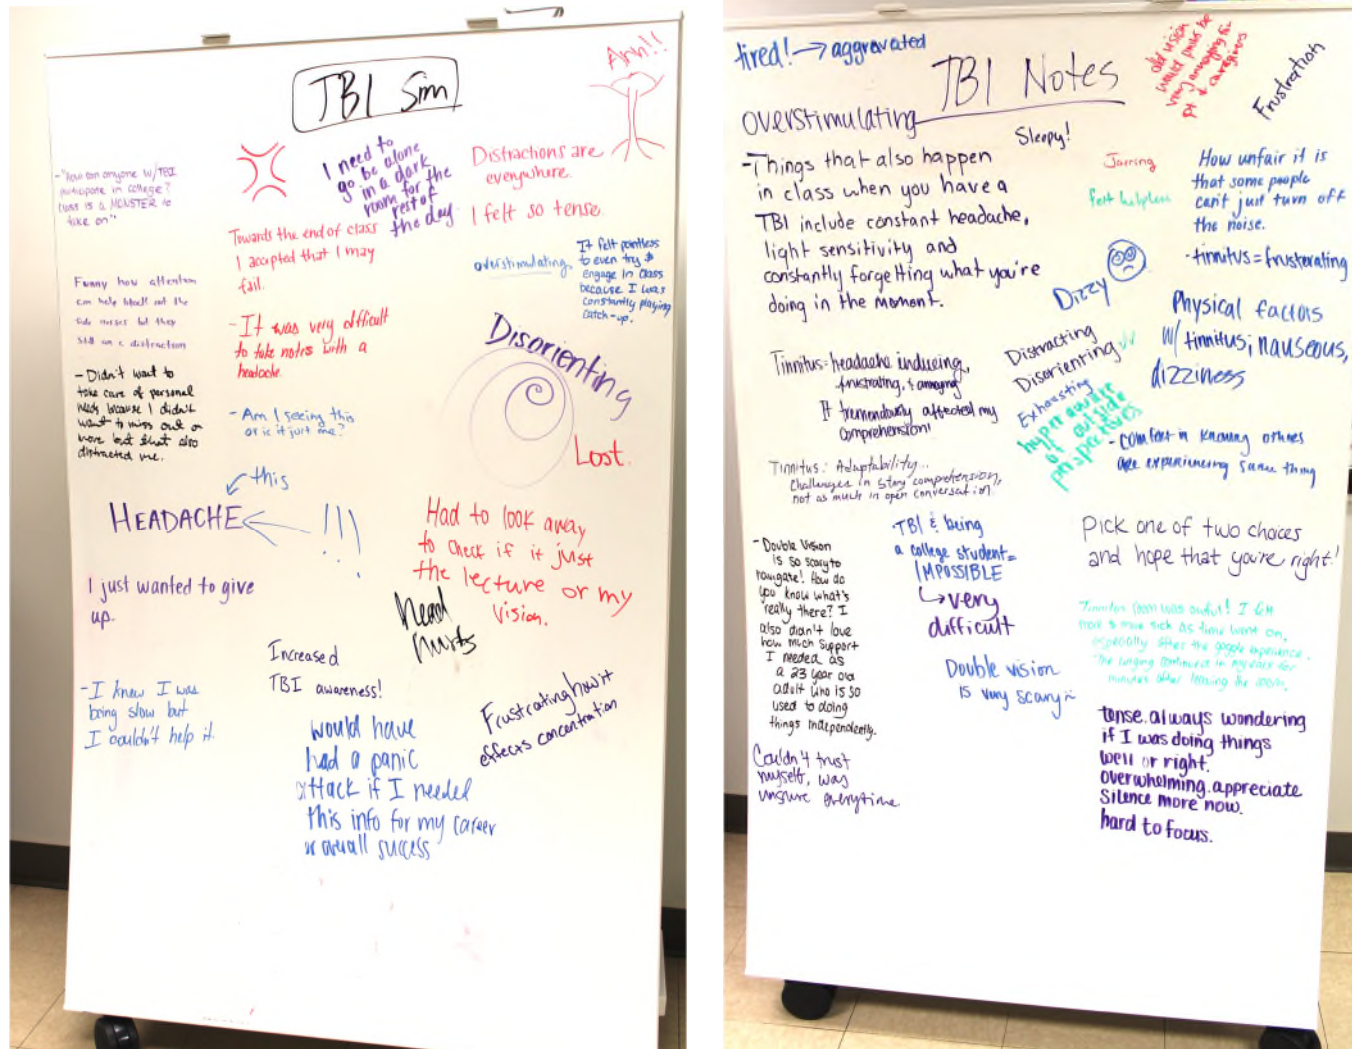

Participants were invited to write any thoughts or feelings during the “passing periods” between simulation activities. The left board was near the manipulated lecture and the right board was placed near the tinnitus and goggle stations. This data is anonymous and provided a social construction of the participant experience.
